# Supplementary material
Source: Research Square preprint supplement (doi:10.21203/rs.3.rs-9336366/v1)
Supplement: Supplementary file 1 [file 25ecc7c196edae20ccba76b0.docx]

**Do all freshwater ponds have similar chemical traits? Evidence on water-quality characteristics and their potential to support harmful cyanotoxins**

Morolake M. Fatunmbi1, Debabrata Sahoo2*, Sarah A. White1, Amy E. Scaroni3, Dawoon Jeong2, Calvin B. Sawyer4

1Department of Plant and Environmental Science, Clemson University, Clemson, SC, 29634, USA.

2Department of Agricultural Sciences, Clemson University, and South Carolina Water Resources Center, Clemson University, Pendleton, SC 29670. USA.

3Department of Forestry and Environmental Conservation, Clemson University, Baruch Institute of Coastal Ecology and Forest Science, Georgetown, SC, 29440, USA

4Department of Agricultural Sciences, Clemson University, Clemson, SC, 29634, USA.

***Correspondence Address:**

Dr. Debabrata Sahoo, PE, PH

Department of Agricultural Sciences, Clemson University, and South Carolina Water Resources Center, Clemson University, 509 Westinghouse Road, Pendleton, SC 29670, USA. Tel: +1-803-404-4340; Email: [dsahoo@clemson.edu.](mailto:dsahoo@clemson.edu.)

Supplementary table 1: Descriptive statistics of water quality parameters by pond type (These parameters are represented in a table rather than boxplot for better visualization)

| S/n | Parameters | Pond types | Mean±SD | Median(IQR) | Min - Max |
| --- | --- | --- | --- | --- | --- |
| 1 | Ammonium-N (mg/L) | Irrigation | 0.15±0.26 | 0.05(0.07) | 0.01– 1.19 |
| Livestock | 0.26±0.71 | 0.04(0.04) | 0.00 – 3.20 |
| Recreation | 0.16±0.47 | 0.04(0.04) | 0.01 – 2.14 |
| Stormwater | 0.08±0.13 | 0.04(0.04) | 0.00 – 0.64 |
| 2 | Nitrate+Nitrite-N (mg/L) | Irrigation | 3.00±7.80 | 0.04(2.85) | 0.00 – 50.47 |
| Livestock | 0.01±0.03 | 0.00(0.00) | 0.00 – 0.16 |
| Recreation | 0.01±0.15 | 0.00(0.00) | 0.00 – 0.63 |
| Stormwater | 0.14±0.32 | 0.00(0.01) | 0.00 – 1.30 |
| 3 | SRP (mg/L) | Irrigation | 0.24±1.06 | 0.01(0.04) | 0.00 – 7.32 |
| Livestock | 0.10±0.21 | 0.01(0.03) | 0.01 – 0.86 |
| Recreation | 0.01±0.01 | 0.01(0.02) | 0.00 – 0.03 |
| Stormwater | 0.04±0.06 | 0.02(0.02) | 0.00 – 0.20 |
| 4 | Microcystin (µg/L) | Irrigation | 1.51±8.23 | 0.11(0.12) | 0.01 – 56.90 |
| Livestock | 23.0±91.3 | 0.43(2.37) | 0.05 – 544.90 |
| Recreation | 0.19±0.22 | 0.14(0.13) | 0.04 – 1.21 |
| Stormwater | 0.15±0.10 | 0.17(0.13) | 0.03 – 0.24 |
| 5 | Phycocyanin (µg/L) | Irrigation | 8.03±11.57 | 2.45(9.59) | 0.17 – 53.03 |
| Livestock | 28.52±52.28 | 5.55(29.85) | 0.19 – 274.25 |
| Recreation | 5.63±6.83 | 2.77(6.75) | 0.02 – 24.98 |
| Stormwater | 4.01±7.66 | 1.81(2.64) | 0.06 – 40.65 |

SRP: Soluble reactive phosphorus


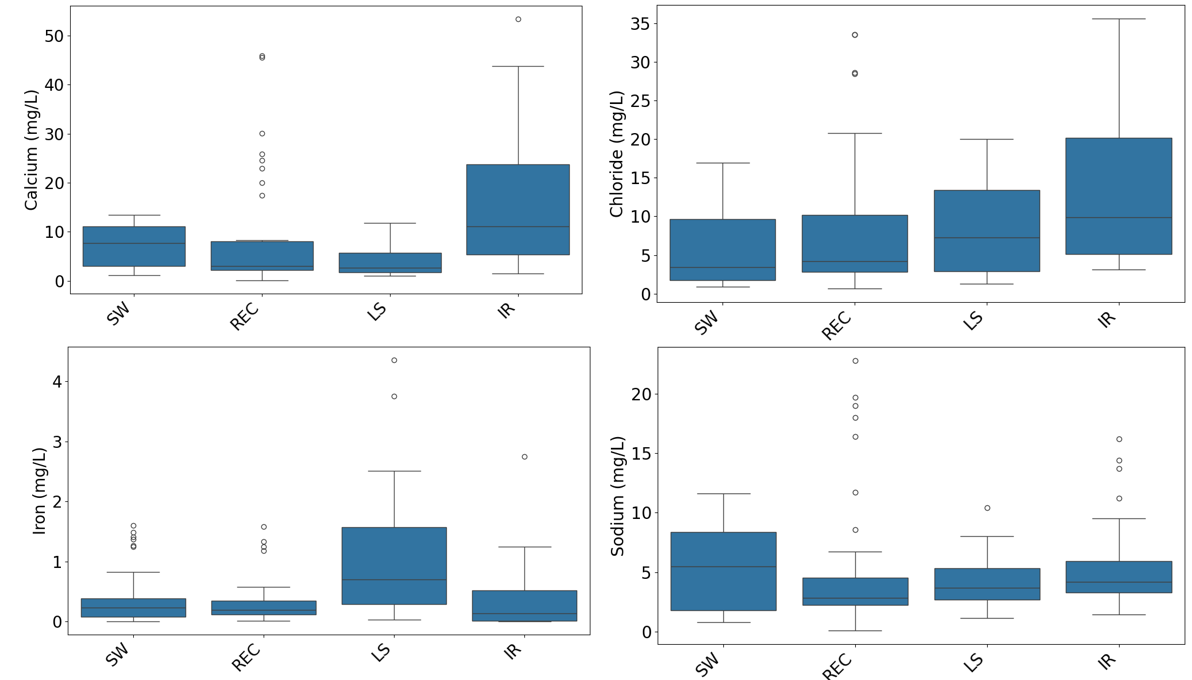


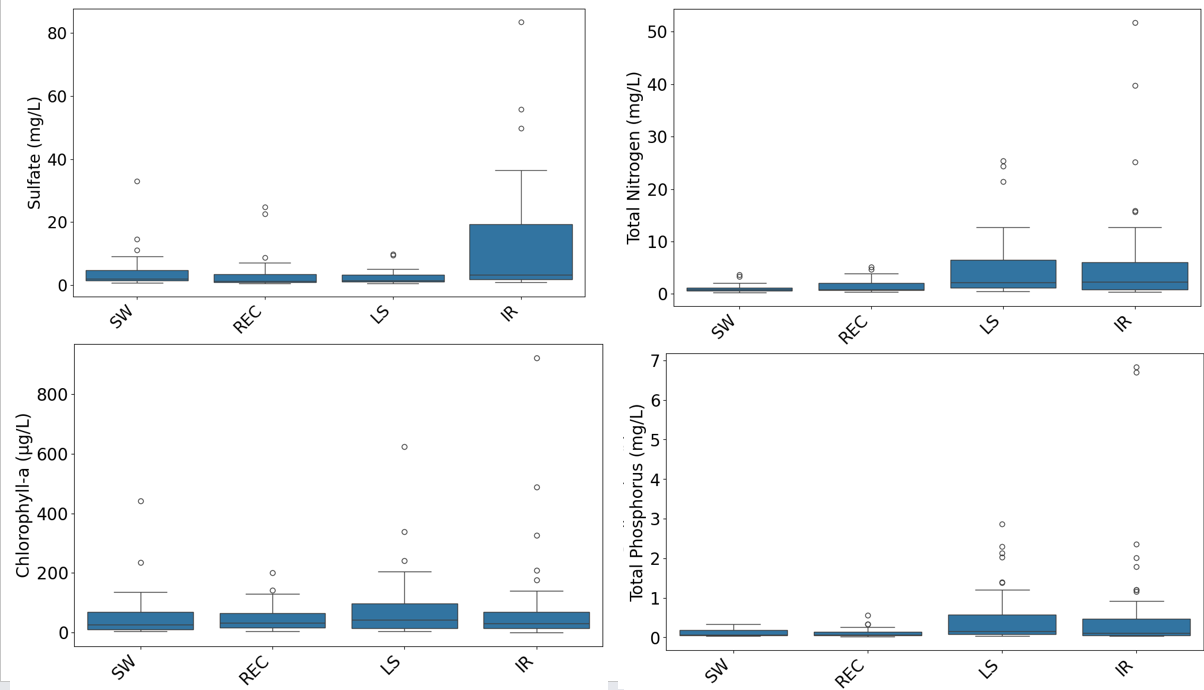


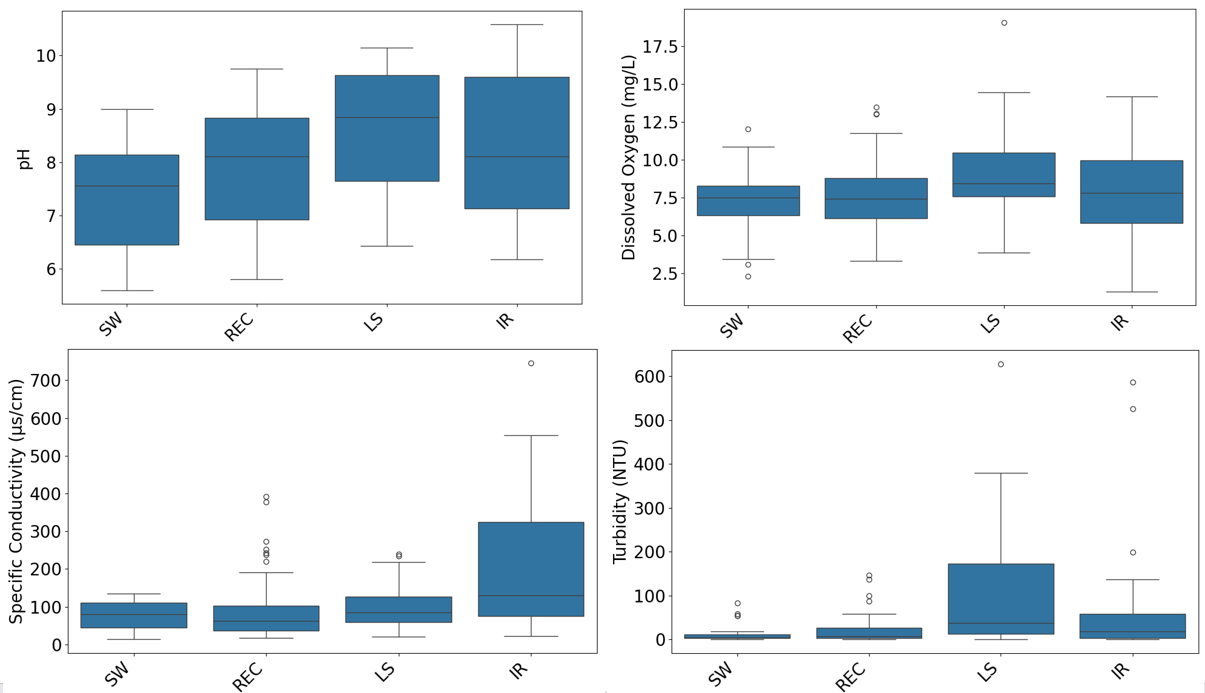


Supplementary figure 1: Boxplots showing the distribution of selected water quality parameters (calcium, chloride, iron, sodium, sulfate, total nitrogen, chlorophyll-a, total phosphorus, pH, dissolved oxygen, specific conductivity, and turbidity) across four pond types: Stormwater (SW), Recreation (REC), Livestock (LS), and Irrigation (IR).
